# Supplementary material
Source: PubMed Central journal article supplement (PMC5740268)
Supplement: rspb20171192supp1.pdf [file rspb20171192supp1.pdf]

# Electronic supplementary material

1

## 1 Functions and aggregate parameters

2

|                             | Functions and aggregate parameters                                                                                                          | Definition                                      | Units           |
|-----------------------------|---------------------------------------------------------------------------------------------------------------------------------------------|-------------------------------------------------|-----------------|
| $\phi_i$                    | $\kappa/(1 - \alpha_i\eta - \alpha_2(1 - \eta))$                                                                                            | Population density on converted land            | H               |
| $S(\mathbf{H}, \mathbf{q})$ | $\left(1 - \frac{\mathbf{H}}{\phi(\mathbf{q})}\right)^z$                                                                                    | Long-term species richness                      | –               |
| $\gamma_2$                  | $(1 - \eta) T_m \alpha_2^{\alpha_2} \left(\frac{1 - \alpha_2}{\kappa}\right)^{1 - \alpha_2}$                                                | Max. <i>per capita</i> industrial consumption   | H <sup>-1</sup> |
| $\gamma_{1i}$               | $\eta T_m \alpha_i^{\alpha_i} \left(\frac{1 - \alpha_i}{\kappa}\right)^{1 - \alpha_i}$                                                      | Max. <i>per capita</i> agricultural consumption | H <sup>-1</sup> |
| $y_{1i}$                    | $\gamma_{1i} B^\Omega T/T_m$                                                                                                                | Mean <i>per capita</i> agricultural consumption | H <sup>-1</sup> |
| $y_2$                       | $\gamma_2 T/T_m$                                                                                                                            | <i>Per capita</i> industrial consumption        | H <sup>-1</sup> |
| $U_i$                       | $y_{1i}^\eta y_2^{1 - \eta}$                                                                                                                | <i>Per capita</i> consumption utility           | H <sup>-1</sup> |
| $\Delta$                    | $\epsilon - 4\Omega z y_1^{min} \left( \left( \frac{\gamma_{1u}}{y_1^{min}} \right)^{\frac{1}{\Omega z}} - 1 \right) e^{-b_2 \gamma_2 \mu}$ | Sustainability criterion                        | t <sup>-1</sup> |

Table S1: **Functions and aggregate parameters expression and definition.**  $i = \{u, s\}$ ; H: units of labor; t: units of time.

## 2 Parameters definition, units and defaults values

| Parameters               |                                                    | Default values | Units                                              |
|--------------------------|----------------------------------------------------|----------------|----------------------------------------------------|
| Economic parameters      |                                                    |                |                                                    |
| $\eta$                   | Agents preference for agricultural goods           | 0.35           | –                                                  |
| $\alpha_s$               | Sustainable agricultural labor elasticity          | 0.5            | –                                                  |
| $\alpha_u$               | Unsustainable agricultural labor elasticity        | 0.15           | –                                                  |
| $\alpha_2$               | Labor elasticity in the industrial sector          | 0.9            | –                                                  |
| Social parameters        |                                                    |                |                                                    |
| $w_{max}$                | Maximum ostracism                                  | <i>varies</i>  | H <sup>-1</sup>                                    |
| $t$                      | Threshold efficiency                               | –200           | –                                                  |
| $r$                      | Rate of social change                              | –30            | –                                                  |
| Technological parameters |                                                    |                |                                                    |
| $T_m$                    | Maximum technological efficiency                   | 1.8            | H <sup>-<math>\alpha</math></sup>                  |
| $\sigma$                 | Rate of technological change                       | 0.1            | H <sup>-<math>\alpha</math></sup> .t <sup>-1</sup> |
| $\kappa$                 | Land operating cost                                | 1              | H                                                  |
| Demographic parameters   |                                                    |                |                                                    |
| $\mu$                    | Maximum growth rate                                | 1              | H.t <sup>-1</sup>                                  |
| $y_1^{min}$              | Minimum <i>per capita</i> agricultural consumption | 0.3            | H <sup>-1</sup>                                    |
| $b_2$                    | Sensitivity to industrial goods' consumption       | 3.5            | –                                                  |
| Ecological parameters    |                                                    |                |                                                    |
| $\Omega$                 | Concavity of the BES relationship                  | 0.4            | –                                                  |
| $z$                      | Concavity of the SAR                               | 0.2            | –                                                  |
| $\epsilon$               | Ecological relaxation rate                         | 0.1            | t <sup>-1</sup>                                    |

Table S2: **Definition, units and default values of the parameters.** H: units of labor; t: units of time.

## 3 Dynamical system analysis

$$\begin{cases}
 \dot{H} = \mu H \left(1 - e^{y_1^{min} - \bar{y}_1}\right) e^{-b_2 y_2} \\
 \dot{B} = -\epsilon [B - (1 - H/\bar{\phi})^z] \\
 \dot{q} = q(1 - q)(U_s - U_u)(1 - w(q)/U_u) \\
 \dot{T} = \sigma T [1 - T/T_m]
 \end{cases} \quad (1)$$

Parameters and functions are summarized in Tables S1 and S2, with  $\bar{y}_1 = q y_{1s} + (1 - q) y_{1u}$ ,  $\bar{\phi} = q \phi_s + (1 - q) \phi_u$ , the consumption utility  $U_i = y_{1i}^\eta y_{2i}^{1-\eta}$  ( $i = \{u, s\}$ ), and the ostracism function  $w(q) = w_{max} e^{te^{r_q}}$ .

Solving system (1) for  $\dot{H} = 0$ ,  $\dot{B} = 0$ ,  $\dot{T} = 0$  and  $\dot{q} = 0$  gives five equilibria: (1) a sustainable equilibrium,  $(H_s^*, B_s^*, T_m, 1)$ , (2) an unsustainable equilibrium,  $(H_u^*, B_u^*, T_m, 0)$ , (3) a mixed equilibrium,  $(H_c^*, B_c^*, T_m, q^*)$ , and (4) two unviable equilibria,  $(0, 1, T_m, 0)$  and  $(0, 1, T_m, 1)$ .

We first evaluate the Jacobian matrix at the viable equilibria,  $(H^*, B^*, q^*, T_m)$  where  $q^* = 1$  or  $q^* = 0$ .

After simplification, we obtain:

$$J(H^*, B^*, q^*, T_m) = \begin{pmatrix} 0 & \frac{J_1^* \Omega \gamma_1^*}{B^*} & J_1^* (\gamma_{1s} - \gamma_{1u}) & \frac{\gamma_1^* J_1^*}{T_m} \\ -\frac{J_2^*}{\phi^*} & -\epsilon & J_2^* \frac{\phi_s - \phi_u}{\phi^{*2}} & 0 \\ 0 & 0 & J_3^* & 0 \\ 0 & 0 & 0 & -\sigma \end{pmatrix}$$

where  $J_1^* = \mu e^{-b_2 \gamma_2} H^* B^{*\Omega}$ ,  $J_2^* = \epsilon z \left(1 - \frac{H^*}{\phi^*}\right)^{z-1}$ , and  $J_3^* = (U_s(B^*) - U_u(B^*))(1 - 2q^*)(1 - \frac{w(q^*)}{U_u^*})$ .

The determinant  $D$  of this Jacobian matrix is the product of the four eigenvalues of the system. An equilibrium is locally stable if all its eigenvalues are negative, i.e.  $D > 0$ . In order to assess the local stability of the viable equilibria, lets first derive the determinant of  $J(H^*, B^*, q^*, T_m)$ :

$$D = -\epsilon \sigma z \Omega \mu y_1^{min} e^{-b_2 \gamma_2} (B^{*-\frac{1}{z}} - 1)(1 - 2q^*)[\delta_u^* w(q^*) + U_s(B^*) - U_u(B^*)] \quad (2)$$

where  $\delta_u = \frac{U_u(B^*) - U_s(B^*)}{U_u(B^*)}$ .

We obtain the determinant  $D_s$  of the Jacobian evaluated at the sustainable equilibrium by taking  $B^* = B_s^*$  and  $q^* = 1$ , so that:

$$D_s = \epsilon \sigma z \Omega \mu y_1^{min} e^{-b_2 \gamma_2} (B_s^{*-\frac{1}{z}} - 1) \delta^* [1 - w(1)/U_u(B_s^*)] \quad (3)$$

where  $\delta^* = (U_s(B_s^*) - U_u(B_s^*)) = y_1^{min \eta} \gamma_2^{1-\eta} (1 - (\gamma_{1u}/\gamma_{1s})^\eta)$ . Since  $\gamma_{1u} > \gamma_{1s}$  and  $B_s^* \in [0, 1]$ , we deduce that  $\delta^* < 0$  and  $B_s^{*-\frac{1}{z}} - 1 > 0$ , so that the sign of  $D_s$  depends on the last term of eq. (3). The sustainable equilibrium  $(H_s^*, B_s^*, 1, T_m)$  is thus locally stable ( $D_s > 0$ ) if

$$w(1) > U_u(B_s^*)$$

where  $U_u(B_s^*) = \gamma_2^{1-\eta} y_1^{min \eta} (\gamma_{1u}/\gamma_{1s})^\eta$ .

The determinant  $D_u$  of the Jacobian evaluated at the unsustainable equilibrium ( $B^* = B_u^*$  and  $q^* = 0$ ) is:

$$D_u = -\epsilon \sigma z \Omega \mu y_1^{min} e^{-b_2 \gamma_2} (B_u^{*-\frac{1}{z}} - 1) \delta^* [1 - w(0)/U_u(B_u^*)] \quad (4)$$

where  $\delta^* = (U_s(B_u^*) - U_u(B_u^*)) = y_1^{min \eta} \gamma_2^{1-\eta} ((\gamma_{1s}/\gamma_{1u})^\eta - 1)$ . Since  $\gamma_{1u} > \gamma_{1s}$  and  $B_u^* \in [0, 1]$ , we deduce that  $\delta^* < 0$  and  $B_u^{*-\frac{1}{z}} - 1 > 0$ , so that the sign of  $D_u$  depends on the last term of eq. (3). The unsustainable equilibrium  $(H_u^*, B_u^*, 0, T_m)$  is thus locally stable ( $D_u > 0$ ) if

$$w(0) < U_u(B_u^*)$$

where  $U_u(B_u^*) = \gamma_2^{1-\eta} y_1^{min \eta}$ .

Let us now evaluate the Jacobian matrix at the unviable equilibria,  $(0, 1, q^*, T_m)$  where  $q^* = 1$  or  $q^* = 0$ . After simplification, we obtain:

$$J(0, 1, q^*, T_m) = \begin{pmatrix} J_0^* & 0 & 0 & 0 \\ -\epsilon z / \phi^* & -\epsilon & \epsilon z \frac{\phi_s - \phi_u}{\phi^{*2}} & 0 \\ 0 & 0 & J_3^* & 0 \\ 0 & 0 & 0 & -\sigma \end{pmatrix}$$

where  $J_0^* = \mu e^{-b_2 y_2} (1 - e^{y_1^{min} - \gamma_1^*})$ .

The determinant  $D(0, 1, q^*, T_m)$  writes:

$$D(0, 1, q^*, T_m) = \epsilon \sigma \mu e^{-b_2 \gamma_2} (1 - e^{y_1^{min} - \gamma_1^*}) (1 - 2q^*) (U_s(1) - U_u(1)) [1 - w(q^*) / U_u(1)] \quad (5)$$

where  $U_s(1) = \gamma_{1s}^\eta \gamma_2^{1-\eta}$  and  $U_u(1) = \gamma_{1u}^\eta \gamma_2^{1-\eta}$ , so that  $U_s(1) < U_u(1)$ .

Therefore, the determinant  $D(0, 1, 0, T_m)$  is:

$$D(0, 1, 0, T_m) = \epsilon \sigma \mu e^{-b_2 \gamma_2} (1 - e^{y_1^{min} - \gamma_{1u}}) (U_s(1) - U_u(1)) [1 - w(0) / U_u(1)] \quad (6)$$

Thus, when the viable equilibria are feasible, i.e. when  $y_1^{min} < \gamma_{1u} < \gamma_{1s}$ , the unviable equilibrium  $(0, 1, 0, T_m)$  is stable if  $w(0) > U_u(1)$ . However, since  $U_u(1) > U^*$ , the unviable equilibrium  $(0, 1, 0, T_m)$  is only stable when the corresponding viable equilibrium  $(H_u^*, B_u^*, 0, T_m)$  is unstable.

Similarly, the determinant  $D(0, 1, 1, T_m)$  is:

$$D(0, 1, 1, T_m) = -\epsilon \sigma \mu e^{-b_2 \gamma_2} (1 - e^{y_1^{min} - \gamma_{1s}}) (U_s(1) - U_u(1)) [1 - w(1) / U_u(1)] \quad (7)$$

When the viable equilibria are feasible, the unviable equilibrium  $(0, 1, 1, T_m)$  is stable if  $w(1) < U_u(1)$ . In this case, both viable  $(H_s^*, B_s^*, 1, T_m)$  and unviable  $(0, 1, 1, T_m)$  equilibria can be stable at the same time, if  $U_u(B_s^*) < w(1) < U_u(1)$ .
